# Supplementary material for: Robot-assisted laparoscopic extravesical ureteral reimplantation (RALUR-EV): a narrative review
Source: PubMed Central journal article supplement — Transl Pediatr. 2024 Sep 12;13(9):1634–40. doi: 10.21037/tp-23-336 (PMC11467227; doi:10.21037/tp-23-336), 2024-09-12
Supplement: tp-13-09-1634-rc.pdf [file tp-13-09-1634-rc.pdf]

## Narrative Review Checklist

| Section/Topic             | Item No | Item                                                                                                                                                                               | Reported on Page Number/Line Number                                                 | Reported on Section/Paragraph                   |
|---------------------------|---------|------------------------------------------------------------------------------------------------------------------------------------------------------------------------------------|-------------------------------------------------------------------------------------|-------------------------------------------------|
| <b>TITLE</b>              |         |                                                                                                                                                                                    |                                                                                     |                                                 |
| Title                     | 1       | Identify the report as a Narrative Review or Literature Review.                                                                                                                    | Page 1 (line 2-3)                                                                   | Title page                                      |
| <b>ABSTRACT</b>           |         |                                                                                                                                                                                    |                                                                                     |                                                 |
| Structured summary        | 2       | Provide a structured summary with the subsections as: Background and Objective, Methods, Key Content and Findings, Conclusions.                                                    | Page 2 (line 2-18)                                                                  | Abstract                                        |
| <b>INTRODUCTION</b>       |         |                                                                                                                                                                                    |                                                                                     |                                                 |
| Rationale/background      | 3       | Describe the rationale for the review in the context of what is already known.                                                                                                     | Page 3 (line 2-21)                                                                  | Introduction                                    |
| Objectives                | 4       | Specify the key question(s) identified for the review topic.                                                                                                                       | Page 3 (line 22-25)                                                                 | Introduction                                    |
| <b>METHODS</b>            |         |                                                                                                                                                                                    |                                                                                     |                                                 |
| Research selection        | 5       | Specify the process for identifying the literature search (eg, years considered, language, publication status, study design, and databases of coverage).                           | Page 3 (line 30-43)<br>Page 4 (line 1-2)                                            | Methods                                         |
| <b>DISCUSSION/SUMMARY</b> |         |                                                                                                                                                                                    |                                                                                     |                                                 |
| Narrative                 | 6       | Discuss: 1) research reviewed including fundamental or key findings, 2) limitations and/or quality of research reviewed, and 3) need for future research.                          | Page 4 (line 6-20)<br>Page 5 (line 1-3)<br>Page 2 (line 2-42)<br>Page 7 (line 1-29) | Results of the literature search<br><br>Summary |
| Summary                   | 7       | Provide an overall interpretation of the narrative review in the context of clinical practice for health professionals, policy development and implementation, or future research. | Page 7 (line 32-38)                                                                 | Conclusions                                     |

Article information: <https://dx.doi.org/10.21037/tp-23-336>

\*As the checklist was provided upon initial submission, the page number/line number reported may be changed due to copyediting and may not be referable in the published version. In this case, the section/paragraph may be used as an alternative reference.
